# Supplementary material for: Climate change and health in Israel: adaptation policies for extreme weather events
Source: Springer Nature journal article supplement (doi:10.1186/2045-4015-2-23), 2013-06-27

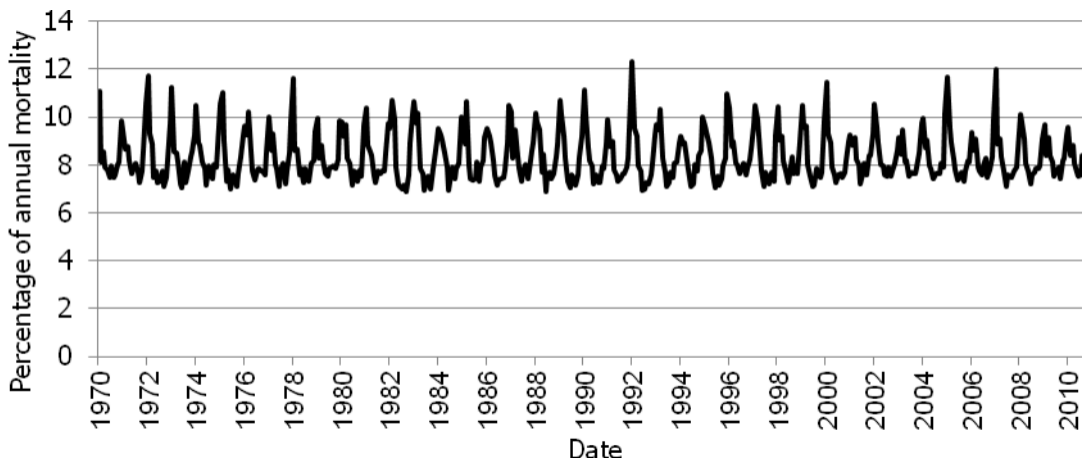

Supplement: 13584_2013_76_MOESM1_ESM.pdf [file 13584_2013_76_MOESM1_ESM.pdf]
