# Supplementary material for: Climate change and health in Israel: adaptation policies for extreme weather events
Source: Springer Nature journal article supplement (doi:10.1186/2045-4015-2-23), 2013-06-27
Supplement: 13584_2013_76_MOESM2_ESM.pdf [file 13584_2013_76_MOESM2_ESM.pdf]

- Existing data collection systems to monitor death in the community should be strengthened (with the help of the primary health clinics, the Ministry of the Interior and the burial services).
- Data on causes of death collected from all sources should include information on possible associations with extreme weather conditions. This may require a change in the way death notifications are completed.
- In addition, data should be reported in real time, using computerized systems and internet communications.
- Data on hospitalizations should be transmitted electronically to the Ministry of Health.
- The reasons for hospitalization should be clearly detailed, particularly if there is a suspicion that the cause of hospitalization is related to weather conditions.
- The lag time in the availability of data should be reduced to 48 hours, and reports should be monitored periodically (including weekends and holidays).
