# Supplementary material for: Climate change and health in Israel: adaptation policies for extreme weather events
Source: Springer Nature journal article supplement (doi:10.1186/2045-4015-2-23), 2013-06-27
Supplement: 13584_2013_76_MOESM3_ESM.pdf [file 13584_2013_76_MOESM3_ESM.pdf]

- The Ministry of Welfare should maintain a current registry of the chronically ill who are particularly sensitive to extreme weather events and are living alone, in addition to the registry of people with special needs.
- The Ministry of the Interior should pass on updated information on the geographic distribution of children under the age of 3 to the Ministry of Welfare.
- The Ministry of Industry, Trade and Labor should maintain a current database on the geographical distribution and job descriptions of outdoor workers.
